# Supplementary material for: Distinct roles of cell wall biogenesis in yeast morphogenesis as revealed by multivariate analysis of high-dimensional morphometric data
Source: PubMed Central journal article supplement — Mol Biol Cell. 2014 Jan 15;25(2):222–33. doi: 10.1091/mbc.E13-07-0396 (PMC3890343; doi:10.1091/mbc.e13-07-0396), 2014-01-15
Supplement: supp_E13-07-0396v1_CombinedSupMats.pdf [file supp_E13-07-0396v1_CombinedSupMats.pdf]

# Supplemental Materials

*Molecular Biology of the Cell*

Okada et al.

**Figure S1:** PC1 explained the majority of the variability of the morphological changes induced by the drug treatments. Morphological data on cells treated with various drug concentrations were subjected to the first PCA, and PCs were extracted. Gray bars and red dots indicate the proportion of variance (left axis) and its cumulative value (right axis), respectively.

**Figure S2:** Independent cell morphology parameters induced by cell wall-affecting drugs. Independent parameters significantly correlated to PC1 in the first PCA (Table S1a–c) were extracted in the second PCA using morphological data from 122 replicated wild-type cells as a null distribution. (A) Proportion of variance in the second PCA. Solid and gray bars indicate the proportion of variance from the five replicated data on drug treated cells and from the 122 replicated data on wild-type cells, respectively. Red dots denote the cumulative proportion of variance for the drug treatment. Red dashed lines denote 0.6 of the cumulative proportion. (B) Dose–response of the independent features determined by the second PCA. PCs plotted for each drug treatment explained 60% of the variance in PC scores. Black dots and lines denote the PCs significantly correlated with at least one morphological parameter (Table S2a–c). Gray dots and lines indicate PCs not correlated with any morphological parameter.

**Figure S3:** Proportion of variance of PCs from the PCA of similar/dissimilar parameters. Color use is as in Figure S1.

**Figure S4:** Similar/dissimilar effects of drug treatment. Legend is as for Figure 5C.

**Figure S5:** Proportion of variance of the PCs from the PCA of *fks1* mutants. Color use is as in Figure S1.

**Figure S6:** Spa2–GFP localization among *fks1* mutants. (A) Cells were incubated with SD–U medium at 25°C until the early log-phase followed by an additional incubation at 37°C for 2 h. Cells were then harvested and observed without fixation. Bar = 5 µm. (B) In the specimens treated at 37°C, Spa2–GFP localized cells were quantified from three independent experiments ( $n > 300$ ), and the mean of the triplicates was plotted. Error bars indicate 1 S.D. \*Significant difference ( $p < 0.05$  by *t*-test after Bonferroni correction). *FKS1*, *fks1-1154*, and *fks1-1163* indicate YOC5041–5043, respectively.

**Figure S7:** Lethality of class II and III *fks1* mutations. Cells containing a plasmid (pYO916) harboring galactose-inducible or glucose-suppressible *FKSI* genes were cultured in liquid SGS–UT medium until the log phase and diluted serially to  $1 \times 10^6$ ,  $1 \times 10^5$ ,  $1 \times 10^4$ ,  $1 \times 10^3$ , and  $1 \times 10^2$  cells/ml. Suspensions (10  $\mu$ l) were dropped onto SGS–UT or SD–UT plates and incubated at 25°C for 3 days. Experiments were replicated at least twice, and representative results are shown. *FKSI*, *fks1-1154*, *fks1-1163*, *fks1-11631154*, and *fks1* $\Delta$  indicate YOC5003–5007, respectively.

Figure S1

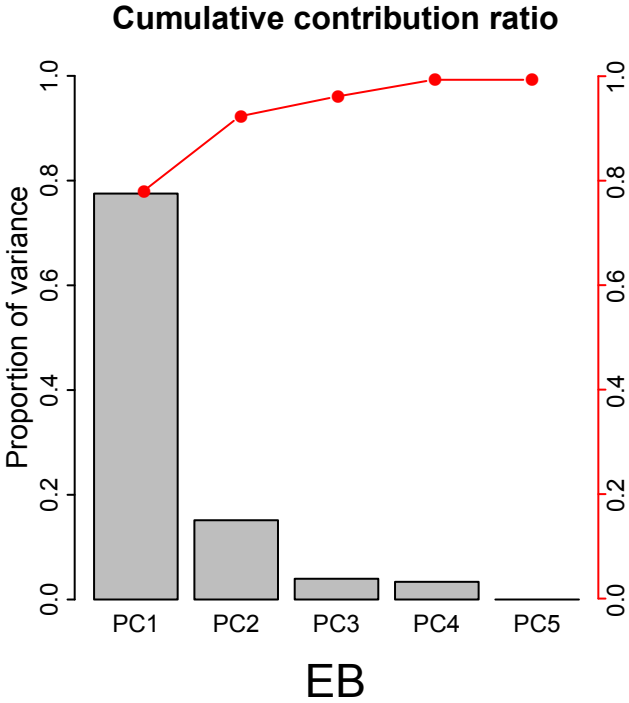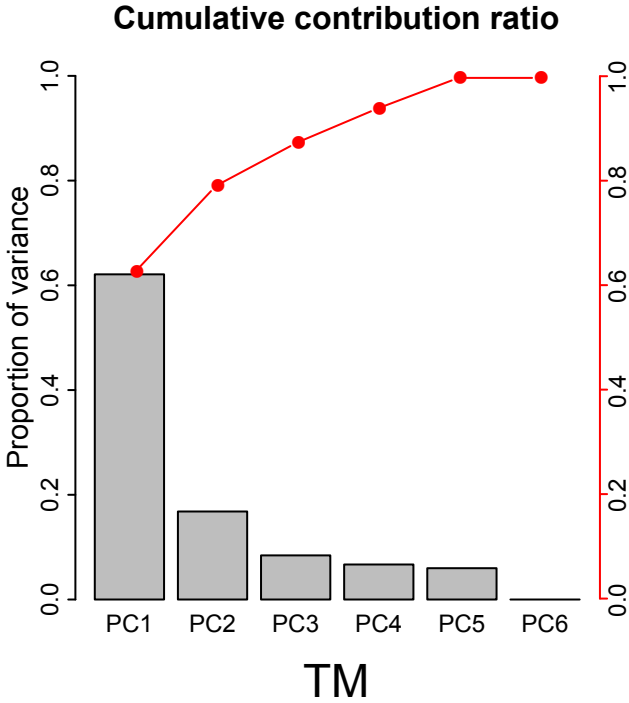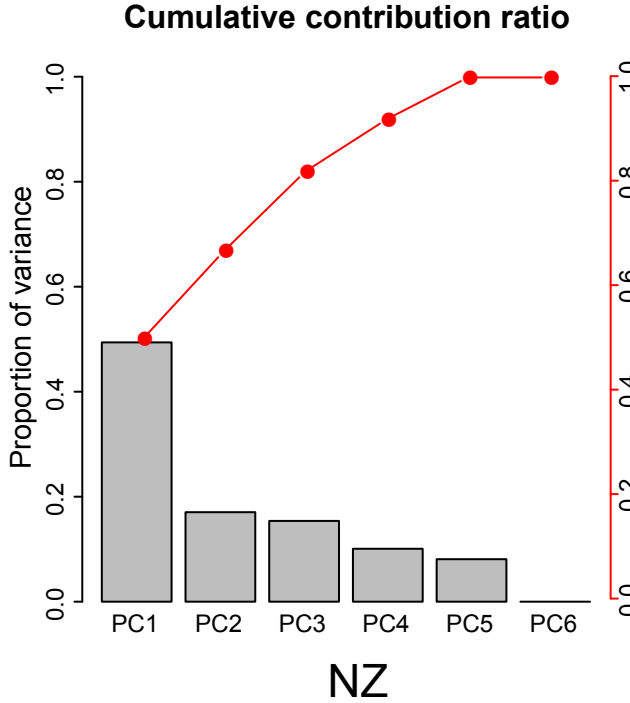

Figure S2

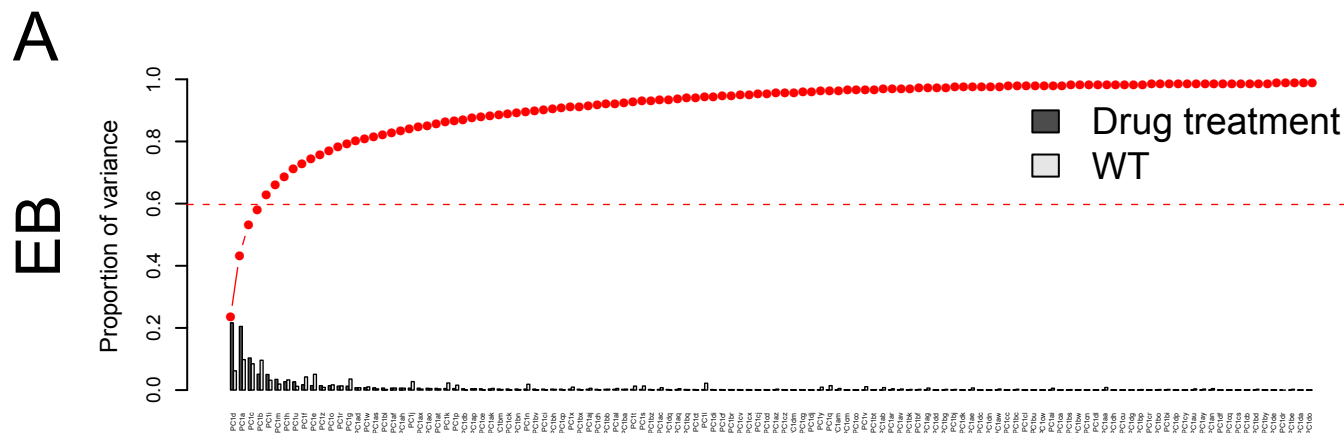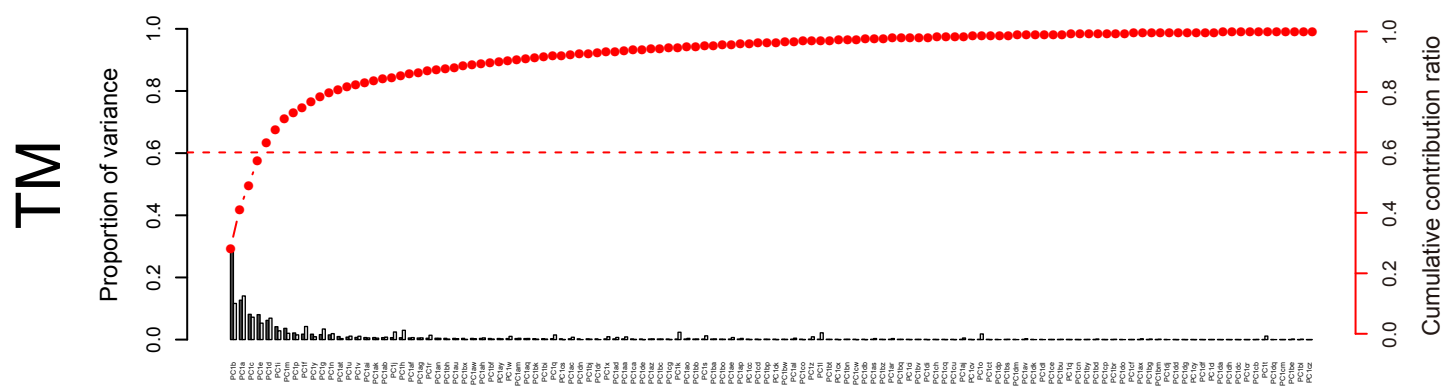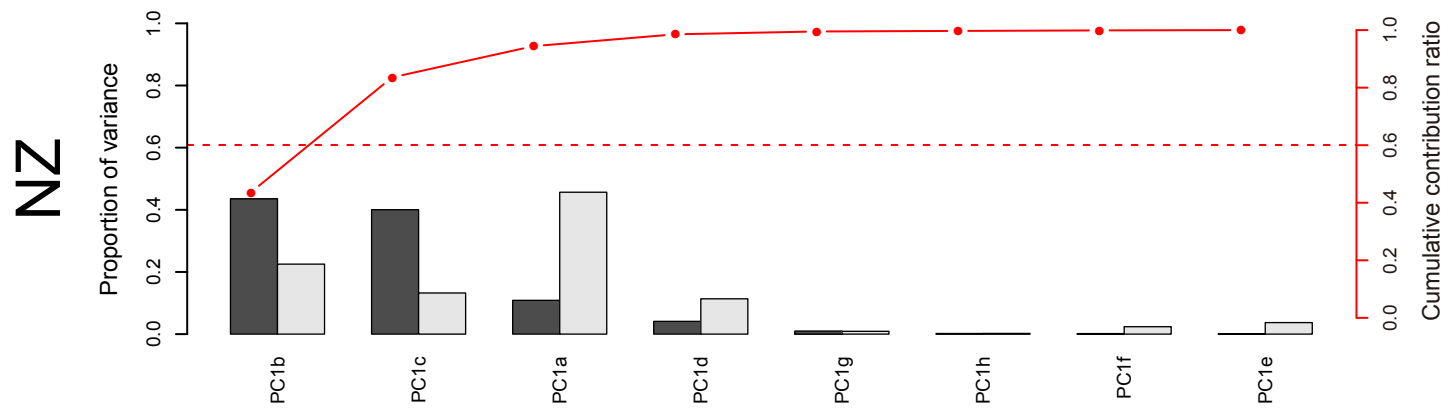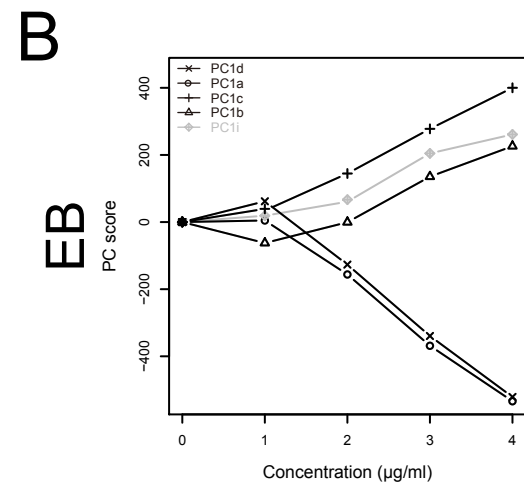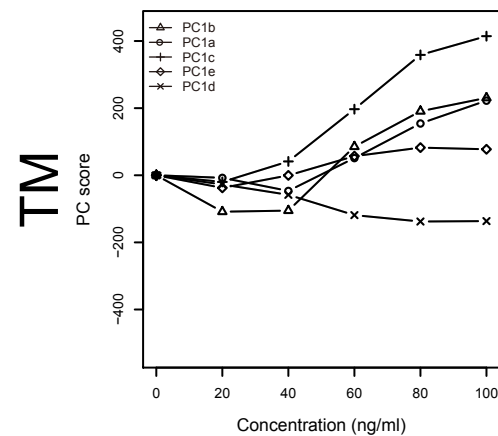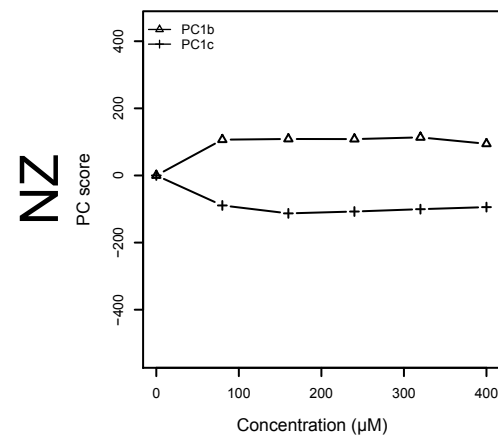

Figure S3

Similar parameter

EB vs TM

Cumulative contribution ratio

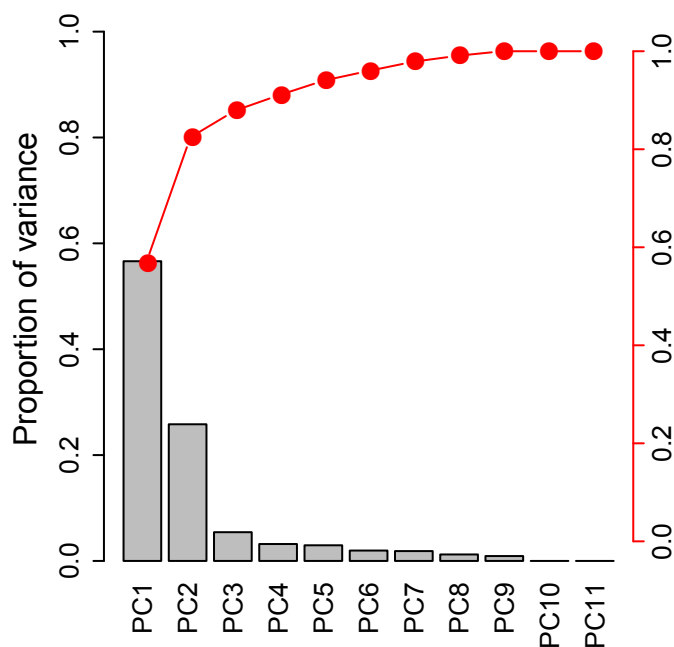

EB vs NZ

Cumulative contribution ratio

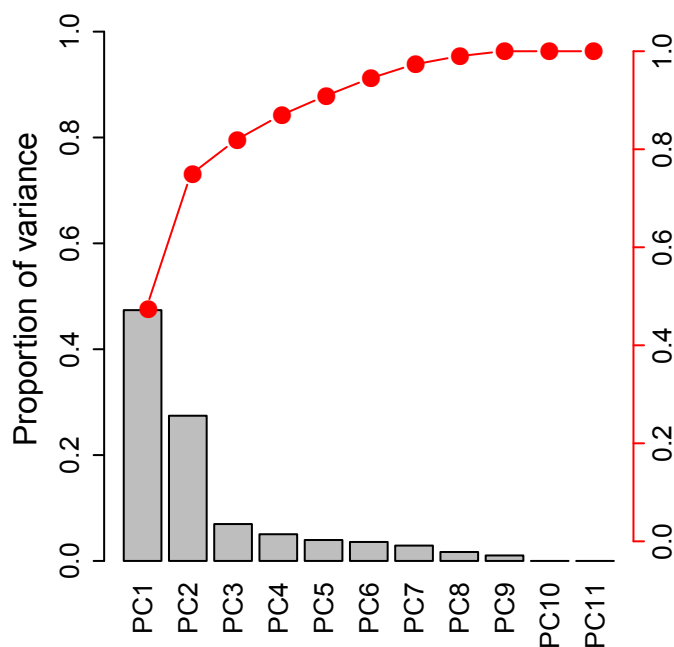

TM vs NZ

Cumulative contribution ratio

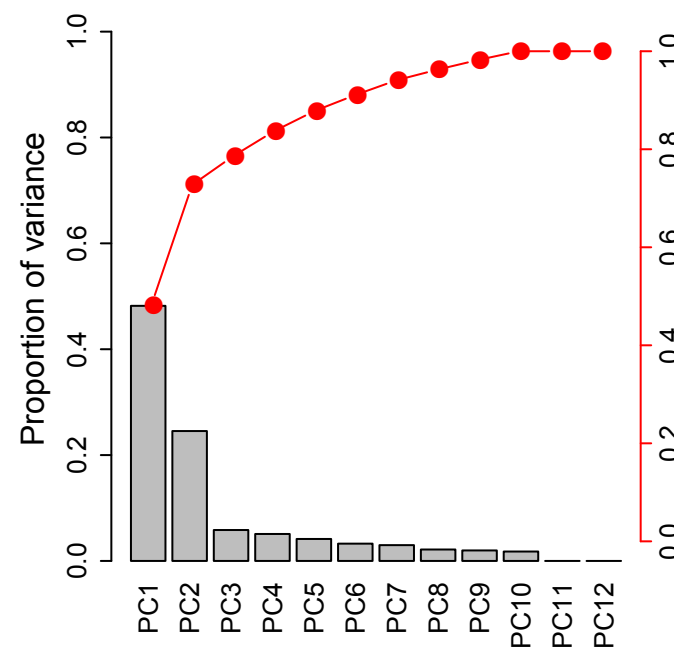

Dissimilar parameter

Cumulative contribution ratio

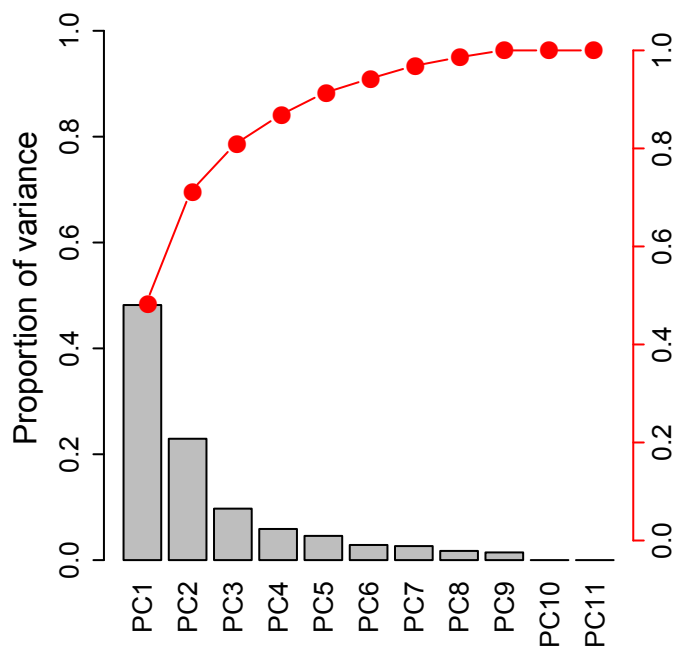

Cumulative contribution ratio

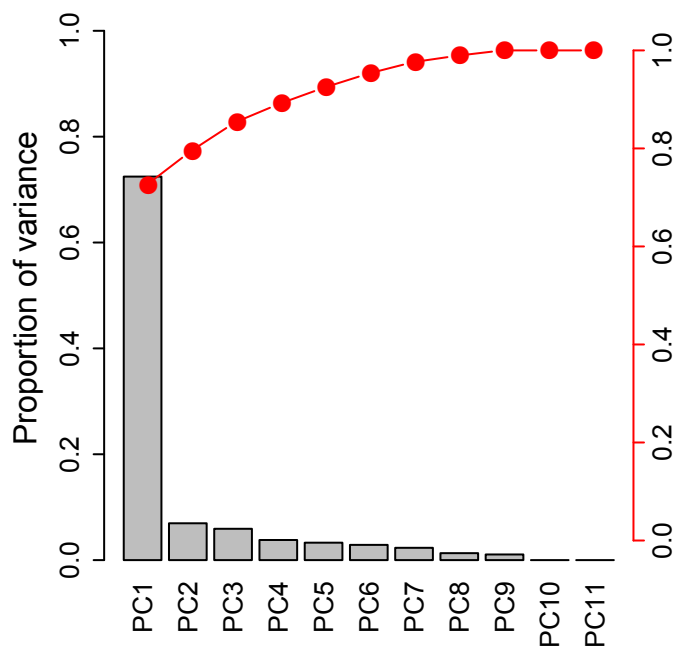

Cumulative contribution ratio

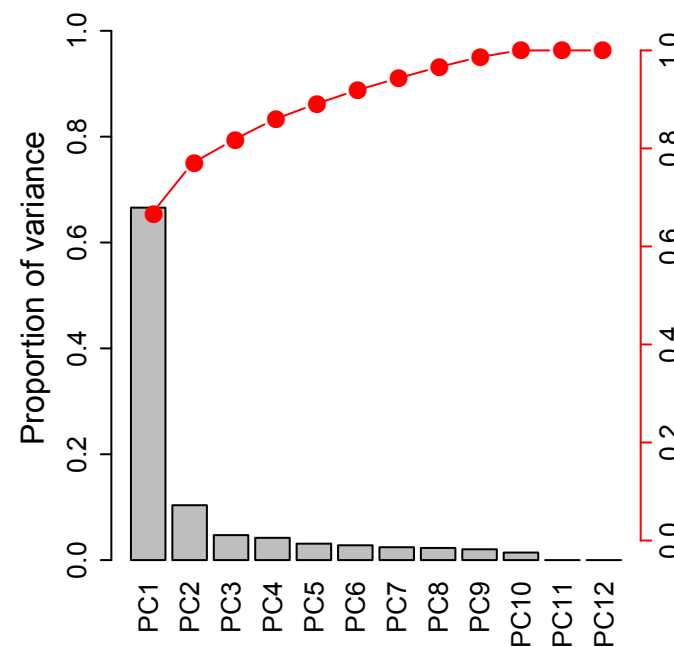

Figure S4

**A**

EB vs NZ

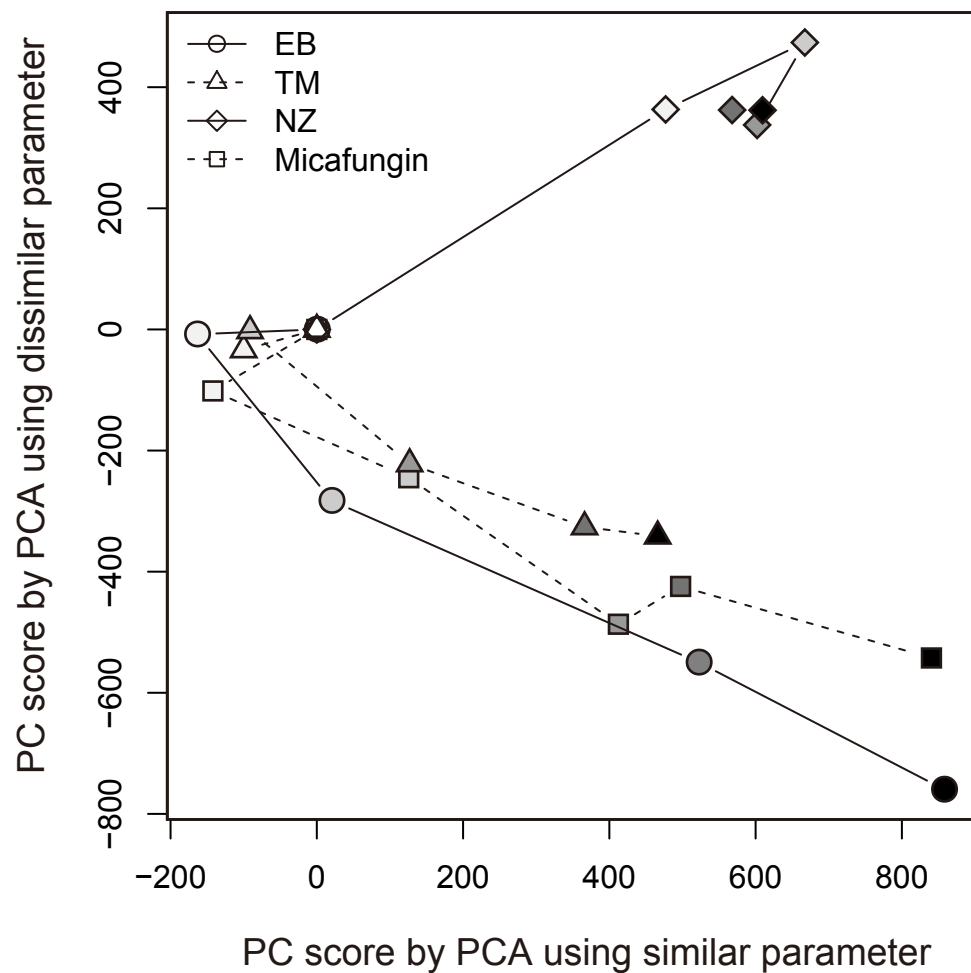

**B**

TM vs NZ

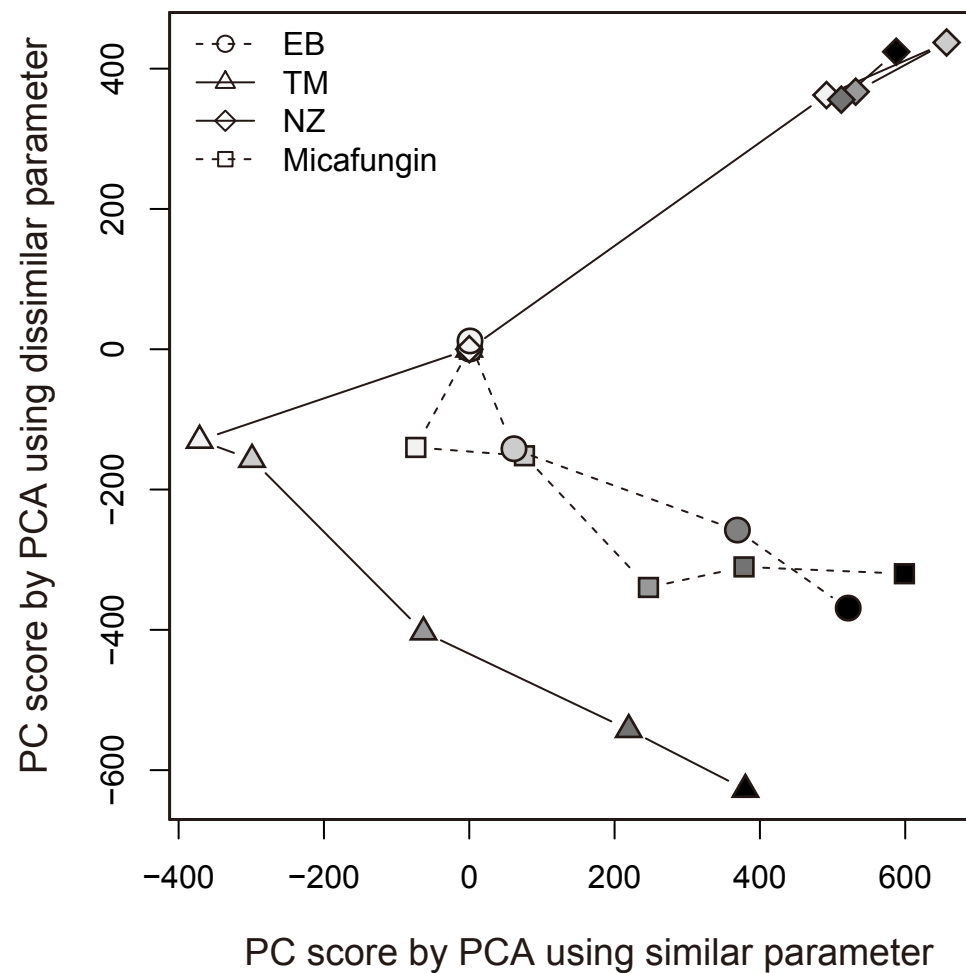

Figure S5

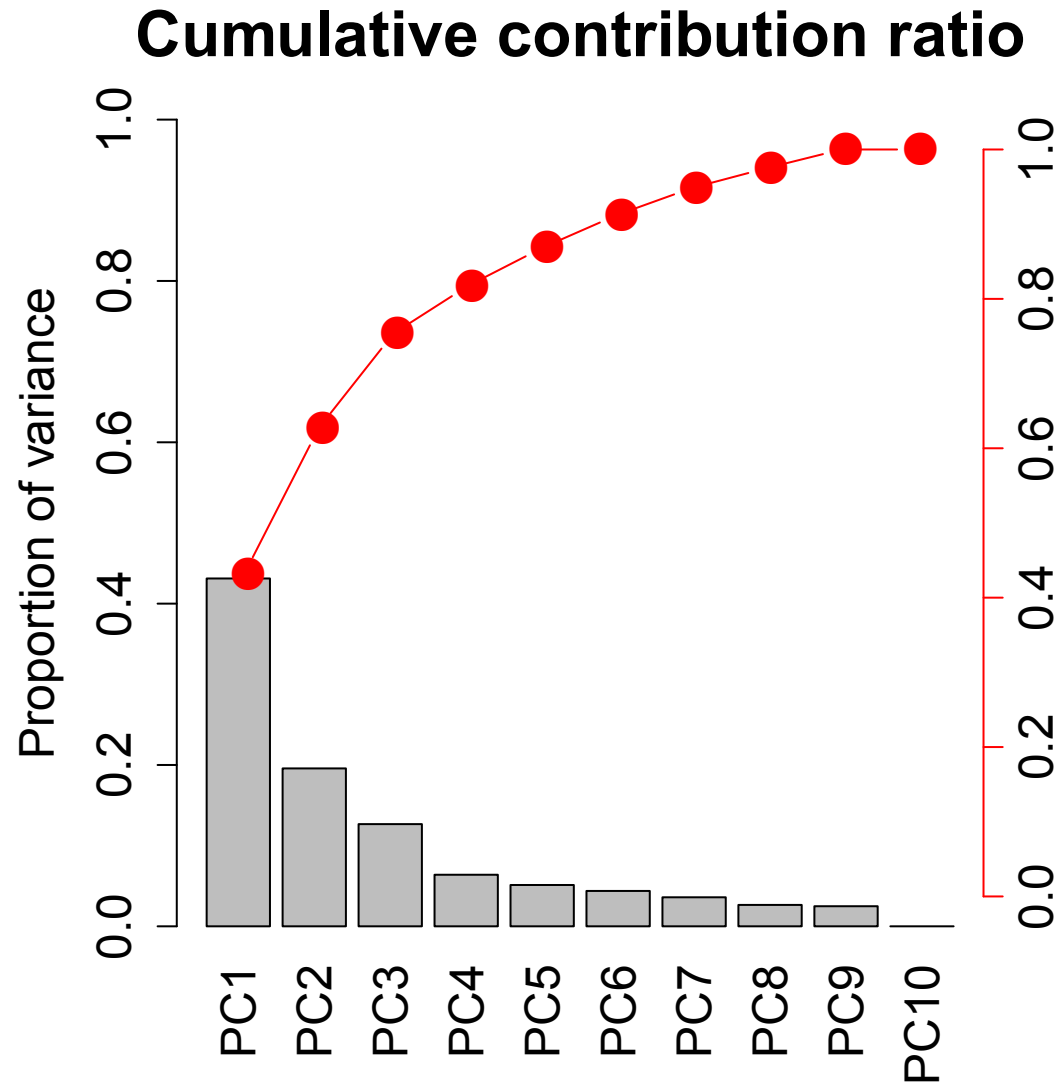



Figure S6

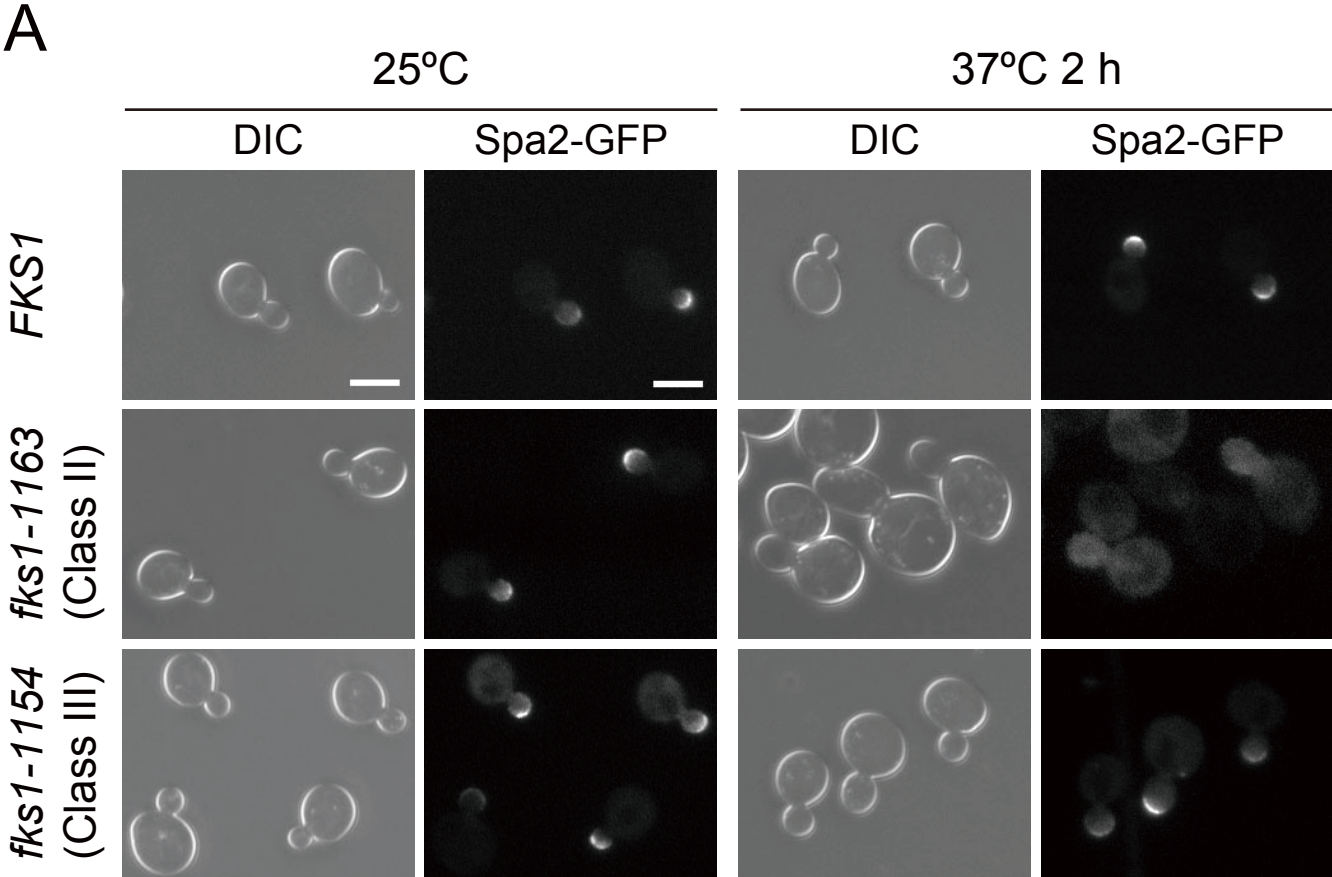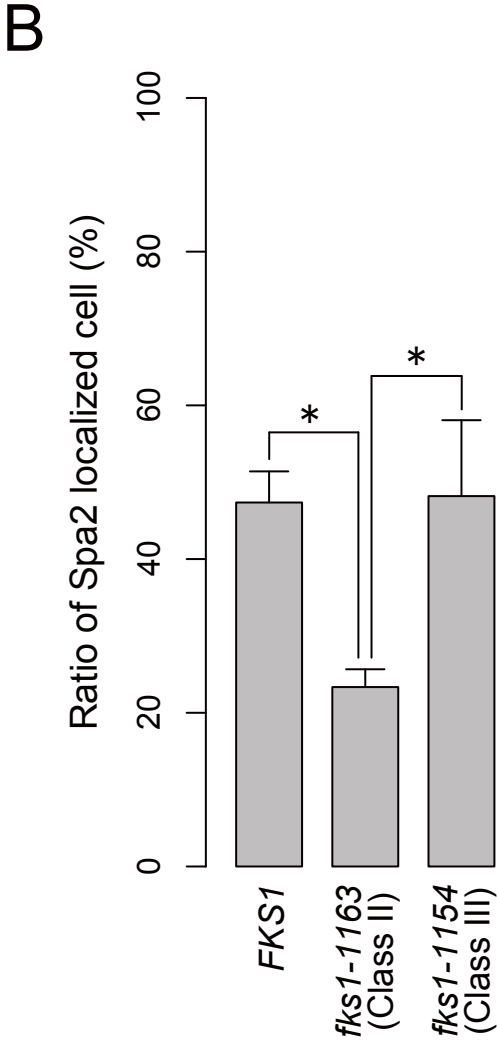

Figure S7

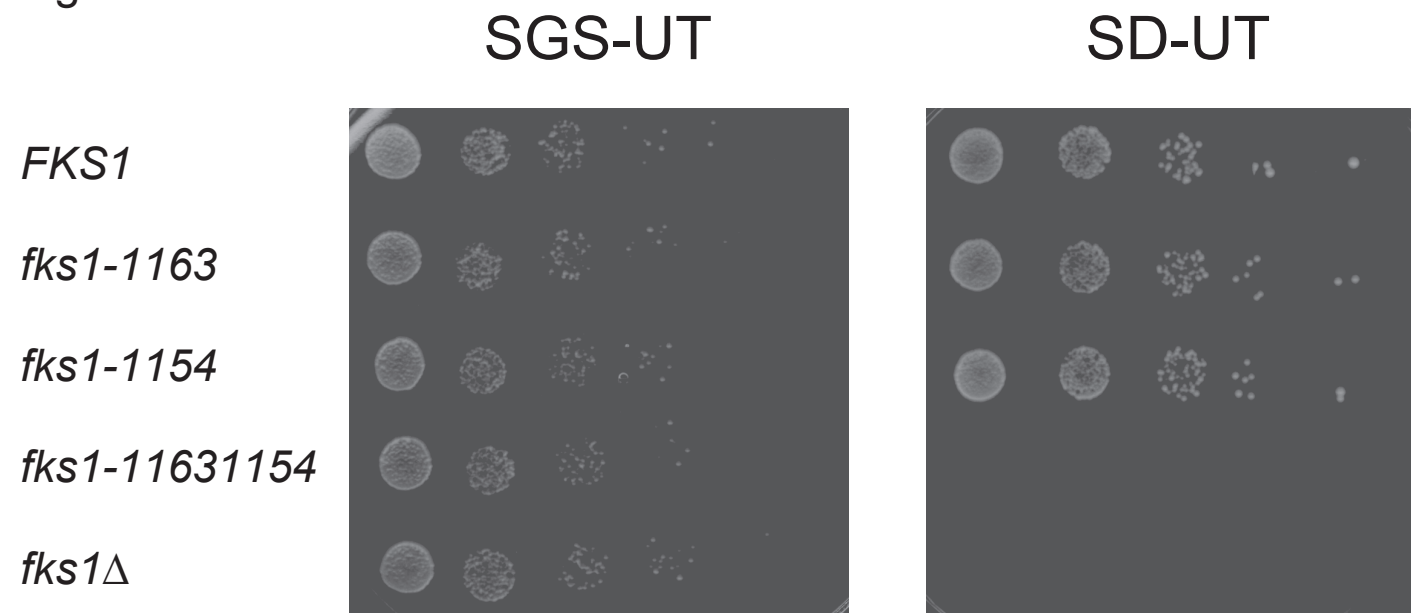

### Supplemental reference list

Brachmann, C. B., Davies, A., Cost, G. J., Caputo, E., Li, J., Hieter, P., and Boeke, J. D. (1998). Designer deletion strains derived from *Saccharomyces cerevisiae* S288C: a useful set of strains and plasmids for PCR-mediated gene disruption and other applications. *Yeast* *14*, 115–132.

Sekiya-Kawasaki, M., Abe, M., Saka, A., Watanabe, D., Kono, K., Minemura-Asakawa, M., Ishihara, S., Watanabe, T., and Ohya, Y. (2002). Dissection of upstream regulatory components of the Rho1p effector, 1,3-beta-glucan synthase, in *Saccharomyces cerevisiae*. *Genetics* *162*, 663–676.

Sikorski, R. S., and Hieter, P. (1989). A system of shuttle vectors and yeast host strains designed for efficient manipulation of DNA in *Saccharomyces cerevisiae*. *Genetics* *122*, 19–27.
